# Supplementary material for: Antibacterial Prophylaxis after Chemotherapy for Solid Tumors and Lymphomas
Source: Atypon-hosted journal article supplement (doi:10.1056/nejmoa050078), 2005-09-07
Supplement: nejm_cullen_pdf_988sa1.pdf [file nejm_cullen_pdf_988sa1.pdf]

## Supplementary Appendix

This appendix has been provided by the authors to give readers additional information about their work.

Supplement to: Cullen M, Steven N, Billingham L, et al. Antibacterial prophylaxis after chemotherapy for solid tumors and lymphomas. *N Engl J Med* 2005;353:988-98.

**Table 1 (web-only). Organisms isolated from blood cultures from patients presenting with probable infection or fever.**

**PLACEBO**

| Patient number | Microbiological evidence of bacteremia |       |                             |                       |                | Trial medication data |           |                                             |
|----------------|----------------------------------------|-------|-----------------------------|-----------------------|----------------|-----------------------|-----------|---------------------------------------------|
|                | Organism                               | Fever | Clinical signs              | Clinical significance | FQ sensitivity | Cycle No.             | Cycle day | Taking trial medication at onset infection? |
| 627            | <i>Streptococcus pneumoniae</i>        | N     |                             | Probably causative    | Not tested     | 1                     | 5         | N                                           |
| 1515           | Group A streptococcus                  | Y     | Cellulitis                  | Probably causative    | R              | 2                     | 5         | N                                           |
| 920            | Coliform                               | Y     |                             | Probably causative    | S              | 4                     | 7         | N                                           |
| 85             | <i>Staphylococcus aureus</i>           | N     |                             | Probably causative    | Not tested     | 4                     | 8         | N                                           |
| 1193           | Coagulase-negative staphylococcus      | Y     |                             | Possible contaminant  | S              | 1                     | 10        | Y                                           |
| 285            | Coagulase-negative staphylococcus      | N     | Low grade fever             | Possible contaminant  | NK             | 2                     | 11        | Y                                           |
| 695            | Group G streptococcus                  | Y     |                             | Probably causative    | R              | 1                     | 11        | Y                                           |
| 206            | <i>Klebsiella pneumoniae</i>           | Y     |                             | Probably causative    | S              | 1                     | 12        | Y                                           |
| 195            | <i>Streptococcus pneumoniae</i>        | Y     | Septic shock; death         | Probably causative    | S              | 3                     | 12        | Y                                           |
| 570            | Alpha-haemolytic streptococcus         | N     | Shock                       | Probably causative    | NK             | 4                     | 14        | Y                                           |
| 1526           | Coagulase-negative staphylococcus      | Y     |                             | Possible contaminant  | NK             | 2                     | 14        | Y                                           |
| 1546           | Coagulase-negative staphylococcus      | Y     |                             | Possible contaminant  | Not tested     | 2                     | 14        | Y                                           |
| 1212           | Alpha-haemolytic streptococcus         | Y     |                             | Probably causative    | R              | 1                     | 15        | Y                                           |
| 964            | Coagulase-negative staphylococcus      | Y     |                             | Possible contaminant  | Not tested     | 3                     | 16        | N                                           |
| 837            | <i>Stenotrophomonas maltiphilia</i>    | Y     | Rigors on flushing line     | Probably causative    | R              | 5                     | 16        | N                                           |
| 799            | Alpha-haemolytic streptococcus         | Y     |                             | Probably causative    | R              | 1                     | 16        | N                                           |
| 1137           | <i>Agrobacterium</i> spp.              | N     | Low grade fever; cellulitis | Probably causative    | S              | 2                     | 29        | N                                           |
| 1259           | Group B streptococcus                  | Y     | Septic shock; death         | Probably causative    | NK             | 3                     | 22        | N                                           |

**LEVOFLOXACIN**

| Patient number | Microbiological evidence of bacteraemia                        |       |                         |                       |                | Trial medication data |           |                                             |
|----------------|----------------------------------------------------------------|-------|-------------------------|-----------------------|----------------|-----------------------|-----------|---------------------------------------------|
|                | Organism                                                       | Fever | Clinical signs          | Clinical significance | FQ sensitivity | Cycle No.             | Cycle day | Taking trial medication at onset infection? |
| 339            | Alpha-haemolytic streptococcus                                 | Y     |                         | Probably causative    | Not tested     | 1                     | 4         | N                                           |
| 932            | <i>Listeria monocytogenes</i>                                  | Y     |                         | Probably causative    | Not tested     | 1                     | 8         | N                                           |
| 1305           | Coagulase-negative staphylococcus                              | Y     |                         | Possible contaminant  | NK             | 2                     | 8         | N                                           |
| 448            | <i>Klebsiella pneumoniae</i> and <i>Pseudomonas aeruginosa</i> | N     | Septic shock; death     | Probably causative    | NK             | 3                     | 10        | N                                           |
| 378            | <i>Propionobacter</i> spp.                                     | Y     |                         | Possible contaminant  | NK             | 4                     | 11        | N                                           |
| 1517           | <i>Escherichia coli</i>                                        | N     |                         | Probably causative    | S              | 2                     | 12        | N                                           |
| 173            | Coagulase-negative staphylococcus                              | Y     | Rigors on flushing line | Probably causative    | NK             | 2                     | 22        | N                                           |
| 469            | Coagulase-negative staphylococcus                              | Y     |                         | Possible contaminant  | S              | 2                     | NK        | NK                                          |

**Table 2 (web-only). Organisms isolated from sites other than blood from patients presenting with probable infection or fever ranked by day of onset.**

**PLACEBO**

| Patient number | Organism                      | Fever | Culture site         | FQ sensitivity | Cycle No. | Cycle day |
|----------------|-------------------------------|-------|----------------------|----------------|-----------|-----------|
| 7              | <i>Staphylococcus aureus</i>  | N     | Hickman line         | NK             | 5         | 2         |
| 15             | coliform                      | N     | MSU                  | Not tested     | 2         | 2         |
| 337            | enterococcus                  | Y     | MSU                  | NK             | 4         | 5         |
| 491            | enterococcus                  | N     | MSU                  | NK             | 2         | 5         |
| 627            | <i>Haemophilus influenzae</i> | N     | Sputum               | NK             | 1         | 5         |
| 366            | <i>Staphylococcus aureus</i>  | N     | Sputum               | NK             | 3         | 8         |
| 607            | <i>E.coli</i>                 | N     | MSU                  | Y              | 1         | 8         |
| 1236           | <i>Staphylococcus aureus</i>  | N     | Line exit site       | NK             | 3         | 9         |
| 1265           | coliform                      | N     | MSU                  | Y              | 2         | 9         |
| 1287           | <i>Staphylococcus aureus</i>  | N     | Laminectomy wound    | N              | 2         | 10        |
| 44             | <i>Staphylococcus aureus</i>  | Y     | PICC line tip        | NK             | 3         | 11        |
| 123            | <i>Pseudomonas</i> spp        | Y     | Wound                | Y              | 1         | 11        |
| 459            | coliform                      | N     | Wound                | Y              | 2         | 11        |
| 604            | <i>Staphylococcus aureus</i>  | N     | PICC line wound swab | NK             | 1         | 11        |
| 335            | <i>E. coli</i>                | N     | MSU                  | NK             | 1         | 12        |
| 337            | enterococcus                  | Y     | MSU                  | NK             | 2         | 12        |
| 490            | <i>Staphylococcus aureus</i>  | N     | Hickman line         | NK             | 4         | 12        |
| 1236           | <i>Staphylococcus aureus</i>  | N     | Line exit site       | NK             | 4         | 12        |
| 153            | <i>Morexella catarrhalis</i>  | N     | Sputum               | NK             | 1         | 13        |
| 1114           | <i>Staphylococcus aureus</i>  | Y     | Exit site            | NK             | 3         | 13        |
| 327            | <i>Haemophilus influenzae</i> | N     | Sputum               | NK             | 3         | 14        |
| 918            | <i>Staphylococcus aureus</i>  | N     | Hickman line         | NK             | 6         | 14        |
| 1295           | <i>Staphylococcus aureus</i>  | Y     | Buttock swab         | Y              | 1         | 14        |
| 1472           | <i>E.coli</i>                 | N     | MSU                  | Y              | 1         | 14        |
| 1086           | coliform                      | N     | MSU                  | NK             | 2         | 15        |
| 617            | <i>E.coli</i>                 | N     | MSU                  | NK             | 2         | 16        |
| 918            | <i>Staphylococcus aureus</i>  | N     | Hickman line         | NK             | 5         | 18        |
| 844            | coliform                      | Y     | MSU                  | Not tested     | 1         | 19        |
| 844            | <i>Staphylococcus aureus</i>  | Y     | Sputum               | N              | 1         | 19        |
| 918            | <i>Staphylococcus aureus</i>  | N     | Hickman line         | NK             | 1         | 19        |
| 1295           | <i>Staphylococcus aureus</i>  | N     | Digit wound          | NK             | 4         | 20        |
| 1086           | coliform                      | N     | MSU                  | NK             | 3         | 21        |
| 1295           | <i>Staphylococcus aureus</i>  | Y     | Digit wound          | NK             | 2         | 21        |
| 284            | coliform                      | N     | MSU                  | Y              | 2         | 22        |
| 740            | <i>Staphylococcus aureus</i>  | N     | Mastectomy scar      | NK             | 2         | 22        |
| 837            | coliform                      | N     | MSU                  | NK             | 2         | 22        |
| 918            | <i>Staphylococcus aureus</i>  | N     | Hickman line         | NK             | 2         | 22        |
| 1259           | <i>Staphylococcus aureus</i>  | Y     | Sputum               | NK             | 3         | 22        |
| 1417           | coliform                      | N     | MSU                  | Y              | 3         | 22        |
| 369            | enterococcus                  | N     | MSU                  | NK             | 4         | 27        |
| 866            | <i>Haemophilus influenzae</i> | N     | Sputum               | Y              | 1         | 35        |

**LEVOFLOXACIN**

| Patient number | Organism                        | Fever | Culture site       | FQ sensitivity | Cycle No. | Cycle day |
|----------------|---------------------------------|-------|--------------------|----------------|-----------|-----------|
| 707            | <i>Staphylococcus aureus</i>    | N     | Hand wound         | NK             | 6         | 2         |
| 13             | <i>Staphylococcus aureus</i>    | N     | MSU                | NK             | 3         | 5         |
| 82             | <i>E.coli</i>                   | N     | MSU                | Y              | 3         | 8         |
| 24             | <i>Streptococcus pneumoniae</i> | N     | Sputum             | NK             | 4         | 9         |
| 82             | <i>E.coli</i>                   | N     | MSU                | Y              | 4         | 10        |
| 660            | coliforms                       | N     | Bronchial lavage   | Y              | 5         | 18        |
| 1466           | enterococcus                    | N     | MSU                | NK             | 3         | 28        |
| 1427           | <i>Streptococcus pneumoniae</i> | Y     | Bronchial washings | N              | 3         | 29        |

**Note:** Most patients were taking trial medication between day 8 and 15 of a three week cycle (shaded blue).
